# Supplementary material for: Association Study between the CD157/BST1 Gene and Autism Spectrum Disorders in a Japanese Population
Source: PubMed Central journal article supplement (PMC4493464; doi:10.3390/brainsci5020188), 2015-05-20
Supplement: brainsci-05-00188-s001.pdf [file brainsci-05-00188-s001.pdf]

## Supplementary Information

**Table S1.** Single-nucleotide polymorphisms (SNPs) tested in the present study.

| #  | SNPs<br>(dbSNP) | Minor Allele Frequencies |       | Success<br>Rate<br>(%) |           |
|----|-----------------|--------------------------|-------|------------------------|-----------|
|    |                 | 1000 Genomes *           |       |                        | HapMap ** |
|    |                 | Global                   | JPT   |                        | JPT       |
| 1  | rs112044965     | 0.015                    | 0     |                        | 67.4      |
| 2  | rs2302468       | 0.076                    | 0.178 |                        | 0         |
| 3  | rs2302467       | 0.493                    | 0.399 | 0.41                   | 0         |
| 4  | rs11947383      | 0.407                    | 0.279 | 0.28                   | 78.7      |
| 5  | rs3756247       | 0.246                    | 0.077 | 0.10                   | 96.3      |
| 6  | rs3756246       | 0.422                    | 0.308 | 0.29                   | 95.3      |
| 7  | rs76682013      | 0.091                    | 0.173 |                        | 97        |
| 8  | rs55735476      | 0.059                    | 0.053 |                        | 97.3      |
| 9  | rs2302466       | 0                        | 0.005 |                        | 96.7      |
| 10 | rs73115627      | 0.133                    | 0.173 |                        | 96.3      |
| 11 | rs28482082      |                          |       |                        | 0         |
| 12 | rs35519415      | 0.499                    | 0.462 |                        | 0         |
| 13 | rs4257653       | 0.228                    | 0.077 |                        | 96.3      |
| 14 | rs4613560       | 0.113                    | 0.048 |                        | 97.3      |
| 15 | rs4631042       | 0.474                    | 0.457 |                        | 85        |
| 16 | rs4541502       | 0.491                    | 0.466 | 0.48                   | 96.3      |
| 17 | rs55757331      | 0.058                    | 0.048 |                        | 97.7      |
| 18 | rs16892260      | 0.263                    | 0.457 | 0.39                   | 96        |
| 19 | rs73224659      | 0.151                    | 0.231 |                        | 95        |
| 20 | rs111520831     | 0.004                    | 0     |                        | 98        |
| 21 | rs116158357     | 0.007                    | 0     |                        | 97.7      |
| 22 | rs73224660      | 0.151                    | 0.231 |                        | 95.3      |
| 23 | rs73224662      | 0.17                     | 0.236 |                        | 98.3      |
| 24 | rs4301112       | 0.164                    | 0.029 |                        | 97.7      |
| 25 | rs3213710       | 0.443                    | 0.466 | 0.47                   | 97.3      |
| 26 | rs4326008       | 0.113                    | 0.048 | 0.05                   | 98        |
| 27 | rs6842052       | 0.216                    | 0.231 |                        | 95.7      |
| 28 | rs73121382      | 0.13                     | 0.183 |                        | 96.3      |
| 29 | rs75476202      | 0.007                    | 0     |                        | 98.3      |
| 30 | rs10008644      | 0.331                    | 0.26  |                        | 97.3      |
| 31 | rs12645405      | 0.428                    | 0.486 |                        | 96.7      |
| 32 | rs28532698      | 0.164                    | 0.029 |                        | 96.7      |
| 33 | rs7699180       | 0.12                     | 0.053 |                        | 96.7      |
| 34 | rs10001565      | 0.163                    | 0.029 | 0.04                   | 96.7      |
| 35 | rs9942275       | 0.17                     | 0.245 | 0.24                   | 97        |
| 36 | rs9291637       | 0.351                    | 0.332 | 0.28                   | 96.7      |
| 37 | rs10018756      | 0.271                    | 0.303 |                        | 96.7      |
| 38 | rs9942211       | 0.123                    | 0.25  | 0.23                   | 97.3      |
| 39 | rs9942247       | 0.174                    | 0.255 | 0.22                   | 95.3      |
| 40 | rs73121395      | 0.172                    | 0.25  |                        | 97.3      |
| 41 | rs35022883      | 0.349                    | 0.332 |                        | 99        |

Table S1. Cont.

| #  | SNPs<br>(dbSNP) | Minor Allele Frequencies |       |           | Success<br>Rate<br>(%) |
|----|-----------------|--------------------------|-------|-----------|------------------------|
|    |                 | 1000 Genomes *           |       | HapMap ** |                        |
|    |                 | Global                   | JPT   | JPT       |                        |
| 42 | rs111796073     | 0.158                    | 0.25  |           | 95.3                   |
| 43 | rs75219005      | 0.115                    | 0.25  |           | 94.4                   |
| 44 | rs76579060      | 0.115                    | 0.25  |           | 97.3                   |
| 45 | rs7688526       | 0.121                    | 0.26  | 0.24      | 97                     |
| 46 | rs7672395       | 0.123                    | 0.269 | 0.26      | 97.3                   |
| 47 | rs12642189      | 0.151                    | 0.26  |           | 99.7                   |
| 48 | rs12651490      | 0.237                    | 0.462 |           | 97.3                   |
| 49 | rs9999956       | 0.269                    | 0.462 |           | 0                      |
| 50 | rs57326588      | 0.238                    | 0.457 |           | 96                     |
| 51 | rs10034735      | 0.105                    | 0     | 0         | 100                    |
| 52 | rs57497036      | 0.237                    | 0.466 |           | 95.3                   |
| 53 | rs11931532      | 0.238                    | 0.457 | 0.48      | 94.4                   |
| 54 | rs11944132      | 0.237                    | 0.466 | 0.48      | 95                     |
| 55 | rs16892271      | 0.237                    | 0.466 |           | 94                     |
| 56 | rs34102992      | 0.152                    | 0.26  |           | 41.9                   |
| 57 | rs36097300      | 0.237                    | 0.466 |           | 95.7                   |
| 58 | rs35016714      | 0.152                    | 0.26  |           | 96.7                   |
| 59 | rs73123607      | 0.238                    | 0.457 |           | 94.7                   |
| 60 | rs6844968       | 0.237                    | 0.466 | 0.47      | 96.3                   |
| 61 | rs6828144       | 0.152                    | 0.26  | 0.26      | 95.7                   |
| 62 | rs6845595       | 0.238                    | 0.457 |           | 97.3                   |
| 63 | rs6845597       | 0.238                    | 0.457 |           | 95                     |
| 64 | rs6449168       | 0.464                    | 0.38  |           | 96.3                   |
| 65 | rs57987867      | 0.237                    | 0.466 |           | 97.3                   |
| 66 | rs58978163      | 0.237                    | 0.466 |           | 96                     |
| 67 | rs16892272      | 0.238                    | 0.457 | 0.46      | 95.3                   |
| 68 | rs73123615      | 0.238                    | 0.457 |           | 96.3                   |
| 69 | rs4292325       | 0.099                    | 0.53  | 0.04      | 97.3                   |
| 70 | rs16892276      | 0.24                     | 0.46  | 0.46      | 96.7                   |
| 71 | rs60913985      | 0.238                    | 0.457 |           | 96.3                   |
| 72 | rs12651052      | 0.187                    | 0.457 | 0.46      | 95                     |
| 73 | rs56381553      | 0.187                    | 0.457 |           | 97.7                   |
| 74 | rs4616747       | 0.89                     | 0     |           | 97                     |
| 75 | rs12645513      | 0.187                    | 0.457 | 0.49      | 96.7                   |
| 76 | rs58335439      | 0.187                    | 0.457 |           | 94.7                   |
| 77 | rs4588454       | 0.1                      | 0.053 | 0.04      | 97.7                   |
| 78 | rs73123625      | 0.187                    | 0.457 |           | 96.7                   |
| 79 | rs59919329      | 0.187                    | 0.457 |           | 96.3                   |
| 80 | rs12645693      | 0.187                    | 0.457 | 0.48      | 97                     |
| 81 | rs12646331      | 0.187                    | 0.457 | 0.47      | 95.3                   |
| 82 | rs12643722      | 0.187                    | 0.457 |           | 24.6                   |
| 83 | rs12640554      | 0.187                    | 0.457 |           | 97.3                   |

Table S1. Cont.

| #   | SNPs<br>(dbSNP) | Minor Allele Frequencies |       | Success<br>Rate<br>(%) |           |
|-----|-----------------|--------------------------|-------|------------------------|-----------|
|     |                 | 1000 Genomes *           |       |                        | HapMap ** |
|     |                 | Global                   | JPT   |                        | JPT       |
| 84  | rs34559912      | 0.414                    | 0.38  | 95                     |           |
| 85  | rs12644354      | 0.187                    | 0.457 | 94.4                   |           |
| 86  | rs12640596      | 0.187                    | 0.457 | 94.4                   |           |
| 87  | rs112043166     | 0.187                    | 0.457 | 99.3                   |           |
| 88  | rs4492001       | 0.098                    | 0.053 | 65.4                   |           |
| 89  | rs4389574       | 0.416                    | 0.38  | 95                     |           |
| 90  | rs111541714     | 0.187                    | 0.457 | 21.9                   |           |
| 91  | rs73125993      | 0.187                    | 0.457 | 90.7                   |           |
| 92  | rs9790535       | 0.187                    | 0.457 | 93.7                   |           |
| 93  | rs9790554       | 0.187                    | 0.457 | 95                     |           |
| 94  | rs9790670       | 0.187                    | 0.457 | 0.48                   | 96.7      |
| 95  | rs16892283      | 0.187                    | 0.457 | 0.48                   | 94        |
| 96  | rs16892287      | 0.001                    | 0     | 0.46                   | 94.7      |
| 97  | rs16892289      | 0.186                    | 0.457 | 0.48                   | 94.7      |
| 98  | rs10516290      | 0.186                    | 0.457 | 0.46                   | 95.7      |
| 99  | rs10516291      | 0.186                    | 0.457 | 0.47                   | 96.3      |
| 100 | rs16898413      | 0.186                    | 0.457 | 0.45                   | 97.3      |
| 101 | rs4328911       | 0.186                    | 0.457 |                        | 95.7      |
| 102 | rs4336219       | 0.186                    | 0.457 |                        | 97.3      |
| 103 | rs4435745       | 0.186                    | 0.457 | 0.46                   | 94.4      |
| 104 | rs4498133       | 0.186                    | 0.457 | 0.48                   | 93.4      |
| 105 | rs1058212       | 0.186                    | 0.47  | 0.48                   | 98.3      |
| 106 | rs4336220       | 0.186                    | 0.457 |                        | 95.7      |
| 107 | rs4259058       | 0.117                    | 0     |                        | 98.7      |
| 108 | rs4342183       | 0.186                    | 0.457 |                        | 95.3      |
| 109 | rs955411        | 0.1                      | 0.053 |                        | 98        |
| 110 | rs955410        | 0.208                    | 0.457 |                        | 94.7      |
| 111 | rs11724635      | 0.408                    | 0.38  |                        | 97.3      |
| 112 | rs4266290       | 0.404                    | 0.38  |                        | 95        |
| 113 | rs4403048       | 0.404                    | 0.38  |                        | 0         |
| 114 | rs4698412       | 0.408                    | 0.38  |                        | 96        |
| 115 | rs73224670      | 0.1                      | 0.053 |                        | 97.3      |
| 116 | rs4273468       | 0.309                    | 0.404 |                        | 96.7      |
| 117 | rs4698413       | 0.408                    | 0.38  |                        | 96.3      |
| 118 | rs4613561       | 0.46                     | 0.38  |                        | 95.7      |
| 119 | rs4538475       | 0.309                    | 0.404 |                        | 96.3      |
| 120 | rs11943501      | 0.098                    | 0.053 |                        | 97.7      |
| 121 | rs11934811      | 0.188                    | 0.337 |                        | 97.7      |

# SNP numbering in this study; \* The 1000 Genomes Browser [1]; \*\* HapMap Genome Browser release #27 [2]; JPT, Japanese in Tokyo, Japan.

**Table S2.** Comparison of genotype and allele frequencies of previously reported Parkinson's disease-associated SNPs at Kanazawa University Hospital for ASDs.

|            | Cases             | Control           | Odds Ratio<br>(95% CI) | <i>p</i> |
|------------|-------------------|-------------------|------------------------|----------|
| rs11931532 |                   |                   |                        |          |
| Genotype   | ( <i>n</i> = 143) | ( <i>n</i> = 138) |                        |          |
| G/G        | 52 (36.4%)        | 46 (33.33%)       | Referent               |          |
| A/G        | 69 (46.9%)        | 70 (50.73%)       | 0.85 (0.50, 1.4)       | 0.5970   |
| A/A        | 24 (16.8%)        | 22 (15.94%)       | 0.97 (0.48, 1.9)       | 1.0000   |
| Allele     | ( <i>n</i> = 286) | ( <i>n</i> = 276) |                        |          |
| G          | 171 (59.8%)       | 162 (58.7%)       | Referent               |          |
| A          | 115 (40.2%)       | 114 (41.3%)       | 0.96 (0.68, 1.3)       | 0.7974   |
| rs12645693 |                   |                   |                        |          |
| Genotype   | ( <i>n</i> = 143) | ( <i>n</i> = 146) |                        |          |
| A/A        | 57 (39.9%)        | 65 (44.5%)        | Referent               |          |
| A/G        | 63 (44.06%)       | 58 (39.7%)        | 1.2 (0.75, 2.1)        | 0.4424   |
| G/G        | 23 (16.08%)       | 23 (15.8%)        | 1.1 (0.58, 2.1)        | 0.7317   |
| Allele     | ( <i>n</i> = 288) | ( <i>n</i> = 292) |                        |          |
| A          | 177 (61.5%)       | 188 (64.4%)       | Referent               |          |
| G          | 109 (37.9%)       | 104 (35.6%)       | 1.1 (0.79, 1.6)        | 0.5471   |
| rs11724635 |                   |                   |                        |          |
| Genotype   | ( <i>n</i> = 145) | ( <i>n</i> = 145) |                        |          |
| G/G        | 66 (45.52%)       | 57 (39.3%)        | Referent               |          |
| G/T        | 65 (44.83%)       | 69 (47.6%)        | 0.81 (0.50, 1.3)       | 0.4542   |
| T/T        | 14 (9.66%)        | 19 (13.1%)        | 0.64 (0.29, 1.4)       | 0.3271   |
| Allele     | ( <i>n</i> = 290) | ( <i>n</i> = 290) |                        |          |
| G          | 197 (67.93%)      | 183 (63.1%)       | Referent               |          |
| T          | 93 (32.07%)       | 107 (36.9%)       | 0.81 (0.57, 1.1)       | 0.2561   |
| rs4698412  |                   |                   |                        |          |
| Genotype   | ( <i>n</i> = 145) | ( <i>n</i> = 141) |                        |          |
| G/G        | 66 (45.52%)       | 54 (38.3%)        | Referent               |          |
| A/G        | 65 (44.83%)       | 69 (48.9%)        | 0.77 (0.47, 1.3)       | 0.3168   |
| A/A        | 14 (9.66%)        | 18 (12.8%)        | 0.64 (0.29, 1.4)       | 0.3201   |
| Allele     | ( <i>n</i> = 290) | ( <i>n</i> = 282) |                        |          |
| G          | 197 (67.93%)      | 177 (62.8%)       | Referent               |          |
| A          | 93 (32.07%)       | 105 (37.2%)       | 0.80 (0.56, 1.1)       | 0.2185   |
| rs4273468  |                   |                   |                        |          |
| Genotype   | ( <i>n</i> = 145) | ( <i>n</i> = 143) |                        |          |
| T/T        | 59 (40.69%)       | 55 (38.5%)        | Referent               |          |
| C/T        | 71 (48.97%)       | 71 (49.7%)        | 0.93 (0.57, 1.5)       | 0.8024   |
| C/C        | 15 (10.34%)       | 17 (11.9%)        | 0.82 (0.37, 1.8)       | 0.6913   |
| Allele     | ( <i>n</i> = 290) | ( <i>n</i> = 286) |                        |          |
| T          | 192 (65.17%)      | 181 (63.3%)       | Referent               |          |
| C          | 104 (34.83%)      | 105 (36.7%)       | 0.93 (0.67, 1.3)       | 0.7298   |

Table S2. Cont.

|          | Cases             | Control           | Odds Ratio<br>(95% CI) | <i>p</i> |
|----------|-------------------|-------------------|------------------------|----------|
|          |                   | rs4538475         |                        |          |
| Genotype | ( <i>n</i> = 144) | ( <i>n</i> = 143) |                        |          |
| C/C      | 58 (40.28%)       | 55 (38.5%)        | Referent               |          |
| C/T      | 65 (45.14%)       | 69 (48.3%)        | 0.89 (0.54, 1.5)       | 0.7024   |
| T/T      | 21 (14.58%)       | 19 (13.3%)        | 1.0 (0.51, 2.2)        | 1.0000   |
| Allele   | ( <i>n</i> = 289) | ( <i>n</i> = 286) |                        |          |
| C        | 181 (62.63%)      | 179 (62.6%)       | Referent               |          |
| T        | 107 (37.02%)      | 107 (37.4%)       | 0.99 (0.71, 1.4)       | 1.0000   |

CI, confidence interval; *p*-Values obtained by Fisher's exact test are given.

**Table S3.** The genotype distributions of the studied SNPs between cases and controls and their risk prediction for ASDs under three genetic models of inheritance.

|            | Cases             | Control           | Odds Ratio<br>(95% CI) | <i>p</i>      | Effect Size,<br><i>w</i> | Chi-Squared<br>Power |
|------------|-------------------|-------------------|------------------------|---------------|--------------------------|----------------------|
| rs4301112  | ( <i>n</i> = 145) | ( <i>n</i> = 146) |                        |               |                          |                      |
|            |                   |                   | Additive               |               |                          |                      |
| A/A        | 129 (88.9%)       | 144 (98.6%)       | Referent               |               |                          |                      |
| G/G        | 2 (1.4%)          | 1 (0.7%)          | 2.23 (0.20, 24.9)      | 0.6054        | 0.193                    | 0.6394               |
|            |                   |                   | Dominant               |               |                          |                      |
| A/A + A/G  | 143 (98.6%)       | 145 (99.3%)       | Referent               |               |                          |                      |
| G/G        | 2 (1.4%)          | 1 (0.7%)          | 2.02 (0.18, 22.6)      | 0.6224        | 0.169                    | 0.5285               |
|            |                   |                   | Recessive              |               |                          |                      |
| A/A        | 129 (88.9%)       | 144 (98.6%)       | Referent               |               |                          |                      |
| A/G + G/G  | 16 (11.0%)        | 2 (1.4%)          | 8.9 (2.01, 39.6)       | <b>0.0005</b> | 0.525                    | 1.0000               |
| rs28532698 | ( <i>n</i> = 145) | ( <i>n</i> = 143) |                        |               |                          |                      |
|            |                   |                   | Additive               |               |                          |                      |
| A/A        | 129 (88.9%)       | 141 (98.6%)       | Referent               |               |                          |                      |
| G/G        | 2 (1.4%)          | 1 (0.7%)          | 2.19 (0.20, 24.4)      | 0.6090        | 0.188                    | 0.6199               |
|            |                   |                   | Dominant               |               |                          |                      |
| A/A + A/G  | 143 (98.6%)       | 142 (99.3%)       | Referent               |               |                          |                      |
| G/G        | 2 (1.4%)          | 1 (0.7%)          | 2.00 (0.18, 22.0)      | 1.0000        | 0.166                    | 0.5170               |
|            |                   |                   | Recessive              |               |                          |                      |
| A/A        | 129 (88.9%)       | 141 (98.6%)       | Referent               |               |                          |                      |
| A/G + G/G  | 16 (11.0%)        | 2 (1.4%)          | 8.7 (2.0, 38.8)        | <b>0.0009</b> | 0.519                    | 1.0000               |
| rs10001565 | ( <i>n</i> = 145) | ( <i>n</i> = 143) |                        |               |                          |                      |
|            |                   |                   | Additive               |               |                          |                      |
| C/C        | 130 (89.7%)       | 141 (98.6%)       | Referent               |               |                          |                      |
| T/T        | 1 (0.7%)          | 1 (0.7%)          | 1.08 (0.07, 17.5)      | 1.0000        | 0.019                    | 0.0557               |

Table S3. Cont.

|           | Cases       | Control     | Odds Ratio        | <i>p</i>             | Effect Size,<br>w | Chi-Squared<br>Power |
|-----------|-------------|-------------|-------------------|----------------------|-------------------|----------------------|
| Dominant  |             |             |                   |                      |                   |                      |
| C/C + C/T | 144 (99.3%) | 142 (99.3%) | Referent          |                      |                   |                      |
| T/T       | 1 (0.7%)    | 1 (0.7%)    | 1.00 (0.06, 15.9) | 1.0000               | 0.000             | 0.050                |
| Recessive |             |             |                   |                      |                   |                      |
| A/A       | 130 (89.7%) | 141 (98.6%) | Referent          |                      |                   |                      |
| C/T + T/T | 15 (10.3%)  | 2 (1.4%)    | 8.1 (1.83, 36.3)  | <b><i>0.0018</i></b> | 0.502             | 1.0000               |

CI, confidence interval; *p*-Values obtained by Fisher's exact test are given. Standard statistical package Stata 12, considering the Woolf approximation was used for this analysis. Significant *p*-values after multiple testing correction for effective total number of SNPs ( $p < 0.002$ ) are written in bold and italicized. Chi-squared power calculation was done by statistical package R.

Table S4. *p*-Values for Hardy-Weinberg proportion tests.

|            | Pearson's Chi-Square<br>Goodness-of-Fit Test |          | Likelihood Ratio Test |         |
|------------|----------------------------------------------|----------|-----------------------|---------|
|            | Cases                                        | Controls | LRT (D)               | LRT (R) |
| rs430112   | 0.0398                                       | 1.11E-15 | 0.0001                | 0.0870  |
| rs28532698 | 0.0398                                       | 2.19E-15 | 0.0001                | 0.0876  |
| rs10001565 | 0.3735                                       | 2.19E-15 | 0.0030                | 0.0993  |

LRT (D), likelihood ratio test of population HWE under dominant disease model; LRT (R), likelihood ratio test of population HWE under recessive disease model. Detailed data for LRT (D) and LRT (R) are given in Supplementary Tables S6 and S7, respectively.

Table S5. Likelihood ratio test of population Hardy-Weinberg equilibrium for rs4301112, rs28532698 and rs10001565 polymorphisms under dominant disease model.

| Genotype<br>Distribution<br>(Cases/Controls) | Disease<br>Model        | <i>q</i> | <i>α</i> | <i>β</i> | <i>γ</i> | Deviance | <i>p</i> |
|----------------------------------------------|-------------------------|----------|----------|----------|----------|----------|----------|
| rs4301112                                    |                         |          |          |          |          |          |          |
| AA (129/144)                                 | Dominant<br>model $H_0$ | 0.017    | 0.014    | 3.636    | 3.636    | 16.077   | 0.0003   |
| AG (14/1)                                    |                         |          |          |          |          |          |          |
| GG (2/1)                                     | Dominant<br>model $H_a$ | 0.009    | 0.014    | 8.064    | 8.064    | 1.391    | 0.2382   |
| Likelihood ratio test of $H_0$ versus $H_a$  |                         |          |          |          |          | 14.686   | 0.0001   |
| Difference of deviance                       |                         |          |          |          |          | 14.686   |          |
| rs28532698                                   |                         |          |          |          |          |          |          |
| AA (129/141)                                 | Dominant<br>model $H_0$ | 0.017    | 0.014    | 3.562    | 3.562    | 15.96264 | 0.0003   |
| AG (14/1)                                    |                         |          |          |          |          |          |          |
| GG (2/1)                                     | Dominant<br>model $H_a$ | 0.009    | 0.014    | 7.914    | 7.914    | 1.391    | 0.2382   |
| Likelihood ratio test of $H_0$ versus $H_a$  |                         |          |          |          |          | 14.572   | 0.0001   |
| Difference of deviance                       |                         |          |          |          |          | 14.572   |          |

Table S5. Cont.

| Genotype Distribution (Cases/Controls)      | Disease Model        | $q$   | $\alpha$ | $\beta$ | $\gamma$ | Deviance | $p$    |
|---------------------------------------------|----------------------|-------|----------|---------|----------|----------|--------|
| rs10001565                                  |                      |       |          |         |          |          |        |
| CC (130/141)                                | Dominant model $H_0$ | 0.014 | 0.014    | 4.111   | 4.111    | 10.976   | 0.0041 |
| CT (14/1)                                   | Dominant model $H_a$ | 0.009 | 0.014    | 7.412   | 7.412    | 2.195    | 0.1385 |
| TT (1/1)                                    |                      |       |          |         |          |          |        |
| Likelihood ratio test of $H_0$ versus $H_a$ |                      |       |          |         |          | 8.782    | 0.0030 |
| Difference of deviance                      |                      |       |          |         |          | 8.782    |        |

$p$ -Values obtained by Fisher's exact test are given.  $q$ , MAF in the population;  $\alpha$ , The baseline disease penetrance in homozygotes of major alleles;  $\beta$ , The relative risk of disease for the heterozygotes in reference to homozygotes of major alleles;  $\gamma$ , The relative risk of disease for the homozygotes of minor alleles.

Table S6. Likelihood ratio test of population Hardy-Weinberg equilibrium for rs4301112, rs28532698 and rs10001565 polymorphisms under recessive disease model.

| Genotype Distribution (Cases/Controls)      | Disease Model         | $q$   | $\alpha$ | $\beta$ | $\gamma$ | Deviance | $p$    |
|---------------------------------------------|-----------------------|-------|----------|---------|----------|----------|--------|
| rs4301112                                   |                       |       |          |         |          |          |        |
| AA (129/144)                                | Recessive model $H_0$ | 0.031 | 0.015    | 1.0     | 13.237   | 17.185   | 0.0002 |
| AG (14/1)                                   | Recessive model $H_a$ | 0.033 | 0.015    | 1.0     | 1.997    | 14.257   | 0.0002 |
| GG (2/1)                                    |                       |       |          |         |          |          |        |
| Likelihood ratio test of $H_0$ versus $H_a$ |                       |       |          |         |          | 2.928    | 0.0870 |
| Difference of deviance                      |                       |       |          |         |          | 2.928    |        |
| rs28532698                                  |                       |       |          |         |          |          |        |
| AA (129/141)                                | Recessive model $H_0$ | 0.031 | 0.015    | 1.0     | 13.006   | 16.894   | 0.0002 |
| AG (14/1)                                   | Recessive model $H_a$ | 0.033 | 0.015    | 1.0     | 1.957    | 13.977   | 0.0002 |
| GG (2/1)                                    |                       |       |          |         |          |          |        |
| Likelihood ratio test of $H_0$ versus $H_a$ |                       |       |          |         |          | 2.918    | 0.0876 |
| Difference of deviance                      |                       |       |          |         |          | 2.918    |        |
| rs10001565                                  |                       |       |          |         |          |          |        |
| CC (130/141)                                | Recessive model $H_0$ | 0.030 | 0.015    | 1.0     | 6.750    | 16.596   | 0.0002 |
| CT (14/1)                                   | Recessive model $H_a$ | 0.033 | 0.015    | 1.0     | 0.986    | 13.879   | 0.0002 |
| TT (1/1)                                    |                       |       |          |         |          |          |        |
| Likelihood ratio test of $H_0$ versus $H_a$ |                       |       |          |         |          | 2.717    | 0.0993 |
| Difference of deviance                      |                       |       |          |         |          | 2.717    |        |

$p$ -Values obtained by Fisher's exact test are given.  $q$ , MAF in the population;  $\alpha$ , The baseline disease penetrance in homozygotes of major alleles;  $\beta$ , The relative risk of disease for the heterozygotes in reference to homozygotes of major alleles;  $\gamma$ , The relative risk of disease for the homozygotes of minor alleles.

**Table S7.** Allele and genotype frequencies of SNPs (rs430112, rs28532698 and rs10001565) in unselected Japanese populations in public databases and *p*-values for Hardy-Weinberg proportion tests.

|                    |   | Allele<br>Frequencies |     | Genotype<br>Frequencies |        | <i>p</i> |
|--------------------|---|-----------------------|-----|-------------------------|--------|----------|
| rs430112           |   |                       |     |                         |        |          |
| 1000 Genomes       | T | 202 (97.1%)           | T/T | 98 (94.2%)              |        |          |
| :phase_3:JPT       | C | 6 (2.9%)              | C/T | 6 (5.8%)                | 0.762  |          |
|                    |   |                       | C/C | 0 (0%)                  | (1.00) |          |
| rs28532698         |   |                       |     |                         |        |          |
| 1000 Genomes       | T | 202 (97.1%)           | T/T | 98 (94.2%)              |        |          |
| :phase_3:JPT       | C | 6 (2.9%)              | C/T | 6 (5.8%)                | 0.762  |          |
|                    |   |                       | C/C | 0 (0%)                  | (1.00) |          |
| rs10001565         |   |                       |     |                         |        |          |
| 1000 Genomes       | C | 202 (97.1%)           | C/C | 98 (94.2%)              |        |          |
| :phase_3:JPT       | T | 6 (2.9%)              | C/T | 6 (5.8%)                | 0.762  |          |
|                    |   |                       | T/T | 0 (0%)                  | (1.00) |          |
| HapMap-JPT         | C | 166 (96.5%)           | C/C | 80 (93.0%)              |        |          |
| ss13847282         | T | 6 (3.5%)              | C/T | 6 (7.0%)                | 0.737  |          |
|                    |   |                       | T/T | 0 (0%)                  | (1.00) |          |
| Human Variation DB | C | 385 (97.2%)           | C/C | 187 (94.4%)             |        |          |
| Study ID: 2_1      | T | 11 (2.8%)             | C/T | 11 (5.5%)               | 0.688  |          |
|                    |   |                       | T/T | 0 (0%)                  | (1.00) |          |
| Human Variation DB | C | 380 (97.9%)           | C/C | 186 (95.8%)             |        |          |
| Study ID: 10_1     | T | 8 (2.1%)              | C/T | 8 (4.1%)                | 0.769  |          |
|                    |   |                       | T/T | 0 (0%)                  | (1.00) |          |
| Human Variation DB | C | 220 (97.3%)           | C/C | 107 (94.6%)             |        |          |
| Study ID: 0_1      | T | 6 (2.7%)              | C/T | 6 (5.5%)                | 0.772  |          |
|                    |   |                       | T/T | 0 (0%)                  | (1.00) |          |

Hardy-Weinberg equilibrium in Japanese populations was tested using data from the Genome 1000 Project [1] and SNP Control Database [3]. JPT, Japanese in Tokyo. CI, confidence interval. *p*-Values for both Pearson's chi-square goodness-of-fit and Fisher's exact tests were calculated; those by Fisher's exact test are given in parentheses.

## References

- 1000 Genomes: A Deep Catalog of Human Genetic Variation. Available online: <http://browser.1000genomes.org/index.html> (accessed on 5 May 2015).
- International HapMap Project. Available online: [http://hapmap.ncbi.nlm.nih.gov/cgi-perl/gbrowse/hapmap27\\_B36/](http://hapmap.ncbi.nlm.nih.gov/cgi-perl/gbrowse/hapmap27_B36/) (accessed on 5 May 2015).
- The SNP Control Database. Available online: [http://gwas.biosciencedbc.jp/snpdb/snp\\_top.php](http://gwas.biosciencedbc.jp/snpdb/snp_top.php) (accessed on 5 May 2015).
